# Supplementary material for: Association between Common Germline Genetic Variation in 94 Candidate Genes or Regions and Risks of Invasive Epithelial Ovarian Cancer
Source: PLoS One. 2009 Jun 19;4(6):e5983. doi: 10.1371/journal.pone.0005983 (PMC2695002; doi:10.1371/journal.pone.0005983)
Supplement: Table S1 — Genotype frequencies for all SNPs in cases and controls (0.07 MB XLS) [file pone.0005983.s001.xls]

## Sheet: Sheet1
Supplementary Table 1: Genotype frequencies for all SNPs in cases and controls
Pathway	Gene/ cytoband	SNP	Cases				Controls
			AA	Aa	aa	Total	AA	Aa	aa	Total
BCAC	2q22.1	rs4954956	809	549	88	1446	1392	919	158	2469
BCAC	5q11.2	rs889312	769	593	111	1473	1265	1000	195	2460
BCAC	8q24.21	rs10505477	393	744	319	1456	398	793	393	1584
BCAC	8q24.21	rs10808556	455	742	265	1462	559	773	249	1581
BCAC	8q24.21	rs13254738	674	613	171	1458	732	638	214	1584
BCAC	8q24.21	rs13281615	526	697	235	1458	881	1200	383	2464
BCAC	8q24.21	rs6983267	387	683	294	1364	660	1201	578	2439
BCAC	8q24.21	rs6983561	1344	97	3	1444	1457	111	3	1571
BCAC	8q24.21	rs9283954	1122	269	18	1409	1950	446	24	2420
BCAC	11p15.5	rs2107425	767	544	149	1460	1118	1098	247	2463
BCAC	12p11.22	rs7313833	640	646	174	1460	1118	1051	288	2457
BCAC	FLJ41481	rs4666451	520	692	242	1454	869	1202	398	2469
BCAC	HCN1	rs981782	381	723	315	1419	696	1185	551	2432
BCAC	LOC100131885	rs2981582	582	663	218	1463	920	1162	384	2466
BCAC	LSP1	rs3817198	648	640	169	1457	1212	1003	220	2435
BCAC	TOX3	rs12443621	433	728	284	1445	732	1197	528	2457
Cell cycle	CCND1	rs602652	394	740	334	1468	742	1225	526	2493
Cell cycle	CCND1	rs3862792	1404	67	0	1471	2335	133	0	2468
Cell cycle	CCND1	rs603965	426	721	329	1476	763	1222	479	2464
Cell cycle	CCND1	rs3212879	438	705	329	1472	661	1238	592	2491
Cell cycle	CCND1	rs3212891	472	708	295	1475	719	1228	529	2476
Cell cycle	CCND1	rs678653	612	657	196	1465	1017	1123	328	2468
Cell cycle	CCND1	rs7178	1234	238	8	1480	2141	337	13	2491
Cell cycle	CCND2	rs3217795	1243	235	7	1485	2091	394	15	2500
Cell cycle	CCND2	rs3217805	524	725	209	1458	905	1177	420	2502
Cell cycle	CCND2	rs3217820	569	660	178	1407	1074	1095	328	2497
Cell cycle	CCND2	rs3217852	868	532	74	1474	1445	895	148	2488
Cell cycle	CCND2	rs3217862	1035	395	40	1470	1724	699	70	2493
Cell cycle	CCND2	rs3217863	1222	220	17	1459	2074	380	18	2472
Cell cycle	CCND2	rs3217869	538	689	256	1483	914	1168	416	2498
Cell cycle	CCND2	rs3217901	455	755	269	1479	804	1209	476	2489
Cell cycle	CCND2	rs3217906	809	565	93	1467	1379	929	165	2473
Cell cycle	CCND2	rs3217916	775	602	99	1476	1280	984	213	2477
Cell cycle	CCND2	rs3217925	829	564	77	1470	1351	939	171	2461
Cell cycle	CCND2	rs3217926	567	701	216	1484	966	1136	398	2500
Cell cycle	CCND2	rs3217933	792	596	90	1478	1383	931	160	2474
Cell cycle	CCND2	rs3217936	681	666	131	1478	1116	1093	280	2489
Cell cycle	CCND3	rs1410492	824	563	92	1479	1437	898	155	2490
Cell cycle	CCND3	rs3218092	969	453	46	1468	1613	750	105	2468
Cell cycle	CCND3	rs2479717	766	588	118	1472	1325	956	208	2489
Cell cycle	CCND3	rs1051130	412	750	313	1475	720	1141	627	2488
Cell cycle	CCND3	rs9529	772	595	114	1481	1277	964	234	2475
Cell cycle	CCND3	rs3218110	816	575	88	1479	1433	903	146	2482
Cell cycle	CCND3	rs3218114	1000	441	43	1484	1662	734	96	2492
Cell cycle	CCNE1	rs997669	530	721	229	1480	939	1194	364	2497
Cell cycle	CCNE1	rs3218036	664	649	163	1476	1166	1084	231	2481
Cell cycle	CCNE1	rs3218038	1365	111	3	1479	2321	174	2	2497
Cell cycle	CCNE1	rs3218076	745	624	111	1480	1264	1049	184	2497
Cell cycle	CDK2	rs2069408	688	630	158	1476	1085	1127	284	2496
Cell cycle	CDK2	rs1045435	1205	261	16	1482	2071	410	16	2497
Cell cycle	CDK4	rs2270777	463	758	256	1477	809	1262	420	2491
Cell cycle	CDK4	rs2069506	690	617	173	1480	1114	1083	285	2482
Cell cycle	CDK6	rs8179	911	486	68	1465	1494	839	107	2440
Cell cycle	CDK6	rs2285332	858	531	87	1476	1384	925	154	2463
Cell cycle	CDK6	rs42046	751	609	106	1466	1286	988	172	2446
Cell cycle	CDK6	rs3731348	1288	172	3	1463	2182	271	12	2465
Cell cycle	CDK6	rs8	870	533	70	1473	1556	831	94	2481
Cell cycle	CDK6	rs2237570	1180	279	15	1474	1927	509	32	2468
Cell cycle	CDK6	rs3731343	421	738	325	1484	729	1240	530	2499
Cell cycle	CDK6	rs3757823	1188	285	13	1486	2010	465	20	2495
Cell cycle	CDK6	rs2079147	376	752	353	1481	633	1269	594	2496
Cell cycle	CDK6	rs2282991	1196	239	14	1449	1924	456	24	2404
Cell cycle	CDK6	rs4729049	1197	272	13	1482	2018	454	27	2499
Cell cycle	CDK6	rs445	1200	268	13	1481	2019	455	23	2497
Cell cycle	CDK6	rs992519	1088	360	29	1477	1868	579	49	2496
Cell cycle	CDKN1A	rs762624	764	594	117	1475	1337	970	176	2483
Cell cycle	CDKN1A	rs2395655	538	693	247	1478	979	1133	375	2487
Cell cycle	CDKN1A	rs3176331	1111	331	29	1471	1877	550	45	2472
Cell cycle	CDKN1A	rs3176336	551	691	239	1481	920	1161	407	2488
Cell cycle	CDKN1A	rs3176343	1323	158	2	1483	2239	248	4	2491
Cell cycle	CDKN1A	rs1801270	1272	200	5	1477	2105	345	13	2463
Cell cycle	CDKN1A	rs3176352	782	571	124	1477	1353	943	180	2476
Cell cycle	CDKN1A	rs1059234	1281	195	7	1483	2124	343	14	2481
Cell cycle	CDKN1A	rs6457937	1407	76	0	1483	2361	134	0	2495
Cell cycle	CDKN1B	rs3759217	1116	345	22	1483	1943	513	36	2492
Cell cycle	CDKN1B	rs34330	864	525	79	1468	1422	901	144	2467
Cell cycle	CDKN1B	rs2066827	887	518	76	1481	1375	934	175	2484
Cell cycle	CDKN1B	rs34329	689	652	140	1481	1171	1079	241	2491
Cell cycle	CDKN1B	rs3093736	1389	92	2	1483	2319	171	3	2493
Cell cycle	CDKN1B	rs7330	549	689	246	1484	919	1183	397	2499
Cell cycle	CDKN1B	rs1420023	1182	275	18	1475	1978	479	29	2486
Cell cycle	CDKN2A	rs3217992	607	690	177	1474	1015	1166	308	2489
Cell cycle	CDKN2A	rs3218005	1186	255	20	1461	2026	426	21	2473
Cell cycle	CDKN2A	rs2811712	1185	268	26	1479	1996	474	24	2494
Cell cycle	CDKN2A	rs3218020	652	661	154	1467	1108	1094	261	2463
Cell cycle	CDKN2A	rs3731197	559	693	224	1476	966	1163	350	2479
Cell cycle	CDKN2A	rs3731211	787	578	111	1476	1304	1006	174	2484
Cell cycle	CDKN2A	rs3731222	1110	346	24	1480	1888	560	49	2497
Cell cycle	CDKN2A	rs4074785	1185	268	18	1471	2020	423	21	2464
Cell cycle	CDKN2A	rs3731239	568	709	201	1478	981	1167	339	2487
Cell cycle	CDKN2A	rs3731249	1391	70	3	1464	2295	153	4	2452
Cell cycle	CDKN2A	rs11515	1075	366	38	1479	1810	639	43	2492
Cell cycle	CDKN2A	rs3088440	1195	265	15	1475	2048	425	17	2490
Cell cycle	CDKN2A	rs3731257	852	550	78	1480	1365	959	152	2476
Cell cycle	CDKN2B	rs3217986	1194	267	17	1478	2040	425	21	2486
Cell cycle	CDKN2B	rs1063192	460	734	282	1476	761	1220	510	2491
Cell cycle	CDKN2B	rs3218009	1116	323	30	1469	1831	605	42	2478
Cell cycle	CDKN2B	rs3218012	467	713	284	1464	799	1210	468	2477
Cell cycle	CDKN2C	rs12855	1204	262	16	1482	2018	458	23	2499
Cell cycle	CDKN2C	rs3176459	650	654	162	1466	1140	1048	292	2480
Cell cycle	CDKN2D	rs1465702	1346	135	2	1483	2279	196	6	2481
Cell cycle	CDKN2D	rs3218222	849	530	89	1468	1429	893	137	2459
Cell cycle	RB1	rs1981434	743	598	122	1463	1227	1024	209	2460
Cell cycle	RB1	rs2854345	964	454	58	1476	1612	766	102	2480
Cell cycle	RB1	rs399413	672	534	108	1314	1029	810	150	1989
Cell cycle	RB1	rs4151540	780	575	114	1469	1241	1022	192	2455
Cell cycle	RB1	rs4151551	1212	246	14	1472	2070	396	21	2487
Cell cycle	RB1	rs2854344	1155	137	12	1304	1685	280	10	1975
Cell cycle	RB1	rs425834	1371	95	6	1472	2316	149	4	2469
Cell cycle	RB1	rs4151611	1338	120	5	1463	2234	234	8	2476
Cell cycle	RB1	rs4151620	973	323	4	1300	1493	436	29	1958
Cell cycle	RB1	rs3092904	725	500	92	1317	1074	783	136	1993
Cell cycle	RB1	rs4151636	1343	121	3	1467	2253	231	5	2489
Cell cycle	STK15	rs732417	1175	212	10	1397	1838	290	11	2139
Cell cycle	STK15	rs1047972	999	400	40	1439	1587	633	66	2286
Cell cycle	STK15	rs2273535	788	475	70	1333	1186	636	95	1917
Cell cycle	STK15	rs8173	743	515	80	1338	1196	808	99	2103
DNA repair	BRCA1	rs799917	608	652	154	1414	1002	920	235	2157
DNA repair	BRCA1	rs1799950	909	126	1	1036	1121	150	4	1275
DNA repair	BRIP	rs11871785	600	695	183	1478	1046	1125	317	2488
DNA repair	BRIP	rs1557720	468	626	223	1317	735	943	309	1987
DNA repair	BRIP	rs11652980	1333	139	4	1476	2267	223	5	2495
DNA repair	BRIP	rs2191249	762	475	76	1313	1100	724	146	1970
DNA repair	BRIP	rs16945628	690	628	163	1481	1102	1095	291	2488
DNA repair	BRIP	rs2191248	616	663	190	1469	1036	1168	278	2482
DNA repair	BRIP	rs16945643	1243	217	11	1471	2092	384	10	2486
DNA repair	BRIP	rs6504074	719	482	93	1294	1022	739	157	1918
DNA repair	BRIP	rs2378908	948	313	26	1287	1507	442	33	1982
DNA repair	BRIP	rs4988344	906	364	45	1315	1427	518	47	1992
DNA repair	BRIP	rs9908659	569	682	227	1478	937	1188	363	2488
DNA repair	BRIP	rs4968451	1020	409	48	1477	1771	660	58	2489
DNA repair	BRIP	rs2048718	443	703	313	1459	730	1255	497	2482
DNA repair	NBS1	rs1063045	637	656	160	1453	1013	1028	264	2305
DNA repair	NBS1	rs1805794	639	634	150	1423	1016	983	268	2267
DNA repair	NBS1	rs709816	579	664	205	1448	922	1023	328	2273
DNA repair	NBS1	rs1061302	595	600	138	1333	916	888	231	2035
DNA repair	RAD51	rs1801320	1210	180	9	1399	1833	249	10	2092
DNA repair	RAD51	rs1801321	472	669	271	1412	703	956	327	1986
DNA repair	RAD52	rs11226	411	730	308	1449	702	1073	518	2293
DNA repair	XRCC2	UNKNOWN	1223	135	6	1364	1751	200	8	1959
DNA repair	XRCC2	rs3218384*	867	495	64	1426	1308	751	101	2160
DNA repair	XRCC2	rs3218536	1152	182	3	1337	1505	266	16	1787
DNA repair	XRCC3	rs1799794	940	484	37	1461	1505	713	89	2307
DNA repair	XRCC3	rs1799796	676	608	177	1461	1040	1006	253	2299
DNA repair	XRCC3	rs861539	545	612	175	1332	784	958	282	2024
Mismatch repair	MLH1	rs1800734	817	416	66	1299	1227	641	89	1957
Mismatch repair	MLH1	rs1540354	854	400	51	1305	1296	591	73	1960
Mismatch repair	MLH1	rs1799977	507	414	96	1017	633	480	125	1238
Mismatch repair	MLH1	rs2286939	397	657	264	1318	638	985	428	2051
Mismatch repair	MLH3	rs7303	340	617	324	1281	531	919	456	1906
Mismatch repair	MLH3	rs175080	404	632	260	1296	592	953	436	1981
Mismatch repair	MSH2	rs4952887	1100	186	16	1302	1620	336	19	1975
Mismatch repair	MSH2	rs13425206	1368	102	5	1475	2308	176	7	2491
Mismatch repair	MSH2	rs3771274	467	631	206	1304	710	954	314	1978
Mismatch repair	MSH2	rs1981928	708	509	97	1314	1063	770	168	2001
Mismatch repair	MSH2	rs2059520	565	585	162	1312	861	872	248	1981
Mismatch repair	MSH2	rs2303428	1089	218	10	1317	1648	373	26	2047
Mismatch repair	MSH3	rs6151662	1311	160	3	1474	2187	258	16	2461
Mismatch repair	MSH3	rs40139	412	665	238	1315	689	932	405	2026
Mismatch repair	MSH3	rs26282	696	514	98	1308	1067	775	146	1988
Mismatch repair	MSH3	rs26779	541	706	228	1475	904	1169	393	2466
Mismatch repair	MSH3	rs33008	676	541	94	1311	1052	767	164	1983
Mismatch repair	MSH3	rs10079641	1215	244	14	1473	2067	371	32	2470
Mismatch repair	MSH3	rs184967	928	345	32	1305	1418	518	47	1983
Mismatch repair	MSH3	rs2897298	1115	329	21	1465	1919	497	34	2450
Mismatch repair	MSH3	rs26279	657	523	121	1301	1062	776	170	2008
Mismatch repair	MSH3	rs2112416	970	308	32	1310	1463	479	43	1985
Mismatch repair	MSH6	rs3136245	844	422	44	1310	1239	626	95	1960
Mismatch repair	MSH6	rs3136272	610	648	192	1450	975	1139	311	2425
Mismatch repair	MSH6	rs1800932	864	401	52	1317	1357	566	78	2001
Mismatch repair	MSH6	rs2348244	929	325	25	1279	1424	461	55	1940
Mismatch repair	MSH6	rs3136317	987	452	37	1476	1724	717	49	2490
Mismatch repair	MSH6	rs1800935	664	539	113	1316	1039	812	175	2026
Mismatch repair	MSH6	rs2020911	488	629	189	1306	744	897	309	1950
Mismatch repair	PMS1	rs3762545	849	413	46	1308	1271	661	86	2018
Mismatch repair	PMS1	rs5742981	1208	91	1	1300	2103	190	6	2299
Mismatch repair	PMS1	rs5741593	1294	164	4	1462	2115	320	12	2447
Mismatch repair	PMS1	rs1233291	720	506	83	1309	1015	816	146	1977
Mismatch repair	PMS1	rs1233255	808	415	48	1271	1213	601	91	1905
Mismatch repair	PMS1	rs1233258	698	503	104	1305	994	812	163	1969
Mismatch repair	PMS1	rs256571	1298	175	2	1475	2186	290	8	2484
Mismatch repair	PMS1	rs256563	1163	287	15	1465	1884	544	34	2462
Mismatch repair	PMS2	rs7797466	837	412	56	1305	1335	565	68	1968
Mismatch repair	PMS2	rs2345060	753	500	66	1319	1133	734	120	1987
Mismatch repair	PMS2	rs2286680	971	318	27	1316	1529	460	37	2026
Mismatch repair	PMS2	rs12112229	724	485	90	1299	1081	748	116	1945
Mismatch repair	PMS2	rs1805321	466	616	235	1317	642	987	351	1980
Mismatch repair	PMS2	rs2228006	1064	371	32	1467	1821	615	42	2478
MMCT-18	AIFM2	rs2394655	959	77	1	1037	1840	138	5	1983
MMCT-18	AIFM2	rs7908957	794	201	22	1017	1471	434	34	1939
MMCT-18	AIFM2	rs1053495	835	119	4	958	1491	234	16	1741
MMCT-18	AIFM2	rs2894111	559	414	73	1046	997	759	169	1925
MMCT-18	AIFM2	rs2394656	303	125	12	440	746	351	37	1134
MMCT-18	AIFM2	rs6480440	259	138	25	422	697	368	75	1140
MMCT-18	AIFM2	rs2280201	806	220	15	1041	1562	398	36	1996
MMCT-18	AIFM2	rs10999147	879	167	3	1049	1722	287	8	2017
MMCT-18	AIFM2	rs3750772	912	112	3	1027	1773	215	7	1995
MMCT-18	AIFM2	rs4295944	358	490	199	1047	703	945	360	2008
MMCT-18	AIFM2	rs2394644	461	129	10	600	576	153	16	745
MMCT-18	AIFM2	rs10999152	602	275	31	908	1161	455	56	1672
MMCT-18	AKTIP	rs9931702	145	211	85	441	362	553	235	1150
MMCT-18	AKTIP	rs17801966	265	78	5	348	670	214	14	898
MMCT-18	AKTIP	rs7189819	519	416	99	1034	930	833	217	1980
MMCT-18	AKTIP	rs3743772	371	40	2	413	971	119	3	1093
MMCT-18	AXIN2	rs11868547	236	408	203	847	457	858	449	1764
MMCT-18	AXIN2	rs7591	388	504	149	1041	775	868	278	1921
MMCT-18	AXIN2	rs4074947	646	356	41	1043	1243	622	81	1946
MMCT-18	AXIN2	rs7210356	816	220	11	1047	1606	387	26	2019
MMCT-18	AXIN2	rs11655966	319	232	43	594	445	329	58	832
MMCT-18	AXIN2	rs4541111	144	308	142	594	229	396	205	830
MMCT-18	AXIN2	rs4791171	464	397	89	950	895	698	142	1735
MMCT-18	AXIN2	rs11079571	410	173	20	603	586	228	17	831
MMCT-18	AXIN2	rs3923087	641	345	55	1041	1256	631	74	1961
MMCT-18	AXIN2	rs3923086	357	495	187	1039	714	964	312	1990
MMCT-18	CASP5	rs518604	297	521	223	1041	630	1003	396	2029
MMCT-18	CASP5	rs523104	319	505	193	1017	616	1000	390	2006
MMCT-18	CASP5	rs3181328	868	160	11	1039	1632	316	33	1981
MMCT-18	CASP5	rs17446518	464	102	8	574	629	169	7	805
MMCT-18	CASP5	rs9651713	816	200	13	1029	1577	365	17	1959
MMCT-18	CASP5	rs3181175	703	307	36	1046	1316	628	57	2001
MMCT-18	CASP5	rs3181174	907	131	6	1044	1695	298	13	2006
MMCT-18	CASP5	rs2282657	392	452	114	958	699	835	205	1739
MMCT-18	CASP5	rs507879	209	527	302	1038	409	992	556	1957
MMCT-18	FILIP1L	rs796977	188	188	61	437	541	488	137	1166
MMCT-18	FILIP1L	rs793477	733	198	13	944	1300	375	30	1705
MMCT-18	FILIP1L	rs793446	354	506	185	1045	706	944	347	1997
MMCT-18	FILIP1L	rs3921767	893	142	5	1040	1695	249	12	1956
MMCT-18	FILIP1L	rs17338680	838	195	13	1046	1630	356	41	2027
MMCT-18	FILIP1L	rs9864437	629	355	63	1047	1191	708	110	2009
MMCT-18	FILIP1L	rs6788750	250	344	117	711	557	757	279	1593
MMCT-18	FILIP1L	rs12494994	698	308	32	1038	1368	536	67	1971
MMCT-18	RBBP8	rs7239066	837	188	15	1040	1538	431	24	1993
MMCT-18	RBBP8	rs11082221	963	72	3	1038	1840	146	3	1991
MMCT-18	RBBP8	rs4474794	426	469	138	1033	776	909	262	1947
MMCT-18	RBBP8	rs9304261	207	122	17	346	531	291	66	888
MMCT-18	RGC32	rs10467472	793	231	21	1045	1499	412	32	1943
MMCT-18	RGC32	rs3783194	747	194	15	956	1388	358	16	1762
MMCT-18	RGC32	rs11618371	837	196	14	1047	1626	363	20	2009
MMCT-18	RGC32	rs9532824	908	139	4	1051	1645	286	18	1949
MMCT-18	RGC32	rs995845	560	406	74	1040	1089	779	127	1995
MMCT-18	RGC32	rs9594551	784	237	22	1043	1420	473	36	1929
MMCT-18	RGC32	rs975590	602	383	48	1033	1140	737	117	1994
MMCT-18	RUVBL1	rs9860614	797	218	24	1039	1564	415	33	2012
MMCT-18	RUVBL1	rs13063604	314	205	45	564	484	256	45	785
MMCT-18	RUVBL1	rs3732402	352	533	160	1045	775	936	294	2005
MMCT-18	RUVBL1	rs7650365	253	550	206	1009	527	979	504	2010
MMCT-18	RUVBL1	rs4857836	540	435	74	1049	1100	804	127	2031
MMCT-18	RUVBL1	rs9821568	747	257	24	1028	1449	483	39	1971
MMCT-18	STAG3	rs11762932	647	345	55	1047	1220	680	107	2007
MMCT-18	STAG3	rs2246713	161	294	136	591	205	424	195	824
MMCT-18	STAG3	rs1637001	583	388	76	1047	1038	816	151	2005
OCAC	11q13.2	rs7931342	385	727	354	1466	411	789	383	1583
OCAC	17q22	rs7501993	535	662	257	1454	582	743	261	1586
OCAC	17q24.3	rs1859962	362	722	362	1446	399	791	391	1581
OCAC	3p12.1	rs2660753	1152	266	19	1437	1256	297	21	1574
OCAC	8q24.21	rs7000448	572	715	185	1472	981	1132	340	2453
OCAC	Xp11.22	rs5945619	585	676	196	1457	679	721	193	1593
OCAC	ABL1	rs2855192	1110	326	34	1470	1886	551	33	2470
OCAC	BRCA2	rs144848	779	569	111	1459	1200	925	169	2294
OCAC	CDC2	rs2448343	600	665	183	1448	1030	1063	327	2420
OCAC	CDK7	rs12656449	1219	243	9	1471	2049	406	21	2476
OCAC	CRCAC	rs10795668	644	646	138	1428	715	698	168	1581
OCAC	CRCAC	rs16892766	1193	236	10	1439	1334	236	9	1579
OCAC	CTBP2	rs12769019	507	397	92	996	794	654	119	1567
OCAC	DESP-1979	rs16901979	1362	99	2	1463	2256	169	3	2428
OCAC	DNMT3A	rs13420827	945	448	69	1462	1033	476	79	1588
OCAC	DPYD	rs1801265	909	489	66	1464	1003	522	68	1593
OCAC	E2F2	rs760607	564	678	214	1456	960	1116	334	2410
OCAC	E2F3	rs7760528	686	629	147	1462	1161	1035	269	2465
OCAC	EHBP1	rs2710646	957	426	71	1454	1031	478	58	1567
OCAC	ESR	rs712221	492	715	238	1445	573	760	237	1570
OCAC	ESR	rs9322336	949	450	54	1453	928	568	77	1573
OCAC	FANCE	rs2395626	456	718	286	1460	480	761	348	1589
OCAC	5q35.3	SNP4	567	696	198	1461	938	1099	333	2370
OCAC	5q35.3	SNP3	430	758	274	1462	668	1219	484	2371
OCAC	5q35.3	SNP2	829	561	77	1467	1299	898	162	2359
OCAC	5q35.3	SNP1	915	501	59	1475	1454	850	107	2411
OCAC	GALNTL2	rs2271077	1317	140	3	1460	1402	185	3	1590
OCAC	11p15.5	SNP3	936	459	62	1457	1473	809	114	2396
OCAC	11p15.5	SNP2	365	697	397	1459	679	1108	620	2407
OCAC	11p15.5	SNP1	986	434	53	1473	1524	786	92	2402
OCAC	IL18	rs1834481	850	511	88	1449	896	572	109	1577
OCAC	JAZF1	rs10486567	828	534	94	1456	867	592	113	1572
OCAC	KLK3	rs2735839	1056	362	41	1459	1135	425	33	1593
OCAC	KU70	rs132788	603	611	168	1382	931	917	234	2082
OCAC	LIG4	rs1805386	1006	408	48	1462	1750	648	68	2466
OCAC	LMTK2	rs6465657	432	690	317	1439	434	805	344	1583
OCAC	MSMB	rs10993994	539	687	228	1454	589	741	252	1582
OCAC	MTHFD1	rs1950902	971	428	52	1451	1072	468	56	1596
OCAC	MTHFS	rs17284990	867	472	79	1418	933	547	88	1568
OCAC	NRIP1	rs2822986	628	666	164	1458	680	713	204	1597
OCAC	PGR	rs10895068	1304	155	3	1462	2139	263	11	2413
OCAC	PGR	rs1042838	1005	377	42	1424	1819	526	63	2408
OCAC	PGR	rs608995	858	527	90	1475	1503	835	135	2473
OCAC	SLC22A3	rs9364554	691	617	141	1449	809	661	117	1587
OCAC	TGFB1	rs1982073	406	472	148	1026	492	582	188	1262
OCAC	TNRC9	rs3803662	797	560	99	1456	1300	945	182	2427
OCAC	TP53	rs2287498	1228	219	12	1459	1345	220	8	1573
OCAC	TP53	rs1042522	808	545	106	1459	1262	874	155	2291
OCAC	TP53	rs12951053	1192	223	13	1428	1318	223	11	1552
OCAC	TP53	rs1625895	1082	308	19	1409	1667	436	33	2136
OCAC	TP53	rs9894946	1045	391	34	1470	1814	615	56	2485
OCAC	TYMS	rs495139	503	717	213	1433	558	761	273	1592
OCAC	12q13.11	SNP1	551	685	225	1461	965	1128	362	2455
OCAC	6p21.1	SNP1	358	724	393	1475	632	1188	598	2418
OCAC	XRCC5	rs16855489	546	718	212	1476	924	1189	371	2484
Oncogene	BRAF	rs10487888	438	750	292	1480	721	1208	552	2481
Oncogene	BRAF	rs1733832	1006	136	7	1149	1801	238	4	2043
Oncogene	BRAF	rs1267622	867	518	73	1458	1418	881	144	2443
Oncogene	BRAF	rs13241719	601	581	122	1304	953	866	213	2032
Oncogene	BRAF	rs17695623	1242	186	6	1434	2102	311	15	2428
Oncogene	BRAF	rs17161747	1301	164	8	1473	2209	249	9	2467
Oncogene	BRAF	rs17623382	1130	313	22	1465	1881	520	38	2439
Oncogene	BRAF	rs6944385	1078	364	29	1471	1859	555	50	2464
Oncogene	ERBB2	rs2952155	835	542	86	1463	1424	916	122	2462
Oncogene	ERBB2	rs2952156	690	663	117	1470	1180	1120	173	2473
Oncogene	ERBB2	rs1801200	852	518	85	1455	1447	844	143	2434
Oncogene	KRAS	rs12305513	1230	239	14	1483	2012	436	24	2472
Oncogene	KRAS	rs12822857	417	712	336	1465	675	1196	575	2446
Oncogene	KRAS	rs10842508	850	535	91	1476	1400	921	148	2469
Oncogene	KRAS	rs12579073	410	709	341	1460	655	1200	587	2442
Oncogene	KRAS	rs10842513	1226	232	11	1469	2003	395	23	2421
Oncogene	KRAS	rs4623993	809	301	30	1140	1456	528	46	2030
Oncogene	KRAS	rs6487464	560	678	232	1470	923	1131	394	2448
Oncogene	KRAS	rs10842514	457	690	326	1473	775	1195	472	2442
Oncogene	KRAS	rs11047917	1306	153	6	1465	2153	294	9	2456
Oncogene	NMI	rs394884	1042	354	16	1412	1810	553	27	2390
Oncogene	NMI	rs11551174	1023	120	7	1150	1810	221	9	2040
Oncogene	NMI	rs289831	1153	269	13	1435	1968	434	32	2434
Oncogene	NMI	rs3771886	494	691	279	1464	842	1191	432	2465
Oncogene	NMI	rs11683487	394	517	261	1172	631	1040	478	2149
Oncogene	NMI	rs2113509	1109	330	20	1459	1912	507	33	2452
Oncogene	PIK3CA	rs2865084	1024	126	4	1154	1841	198	7	2046
Oncogene	PIK3CA	rs7621329	1010	412	44	1466	1690	671	63	2424
Oncogene	PIK3CA	rs1517586	1187	229	13	1429	1973	433	28	2434
Oncogene	PIK3CA	rs2699905	814	500	131	1445	1373	857	209	2439
Oncogene	PIK3CA	rs7641889	1297	172	9	1478	2135	315	13	2463
Oncogene	PIK3CA	rs7651265	1158	271	20	1449	1919	490	26	2435
Oncogene	PIK3CA	rs7640662	1052	391	32	1475	1788	624	60	2472
Oncogene	PIK3CA	rs2677760	389	703	359	1451	654	1225	567	2446
AA: common homozygote; Aa: heterozygote; aa: rare homozygote
