# Supplementary material for: Association between Common Germline Genetic Variation in 94 Candidate Genes or Regions and Risks of Invasive Epithelial Ovarian Cancer
Source: PLoS One. 2009 Jun 19;4(6):e5983. doi: 10.1371/journal.pone.0005983 (PMC2695002; doi:10.1371/journal.pone.0005983)
Supplement: Table S2 — The logistic regression results for all SNPs. (0.36 MB XLS) [file pone.0005983.s002.xls]

## Sheet: Supplementary Table 2
Supplementary Table 2: The Logistic regression results for all SNPs
Pathway / Group	Gene/cytoband	SNP	Call rate (%)**	Cases	Controls	HetOR	HomOR	P-het unadj.	P-het adj.‡	P-trend unadj	P-trend adj.‡
BCAC§	2q22.1	rs4954956	98	1446	2469	1.02 (0.89-1.18)	0.94 (0.71-1.25)	0.84	0.8469	0.9634	0.9651
BCAC§	5q11.2	rs889312	98	1473	2460	0.98 (0.85-1.12)	0.92 (0.71-1.18)	0.7804	0.7895	0.5136	0.533
BCAC§	8q24.21	rs10505477	98	1456	2459	0.97 (0.83-1.14)	0.86 (0.71-1.04)	0.2256	0.2418	0.1166	0.1342
BCAC§	8q24.21	rs10808556	98	1462	2453	1.15 (0.99-1.33)	1.20 (0.99-1.46)	0.1071	0.1189	0.0446	0.0552
BCAC§	8q24.21	rs13254738	97	1458	2451	0.98 (0.85-1.13)	0.91 (0.73-1.13)	0.6801	0.6924	0.4202	0.4416
BCAC§	8q24.21	rs13281615	98	1458	2464	0.93 (0.81-1.08)	0.98 (0.80-1.20)	0.6471	0.6604	0.6699	0.6841
BCAC§	8q24.21	rs6983267	95	1364	2439	0.96 (0.82-1.13)	0.88 (0.72-1.07)	0.4057	0.4225	0.1965	0.2171
BCAC§	8q24.21	rs6983561	97	1444	2456	0.97 (0.75-1.27)	1.86 (0.31-11.15)	0.774	0.7833	0.9962	0.9964
BCAC§	8q24.21	rs9283954	95	1409	2420	1.06 (0.89-1.26)	1.33 (0.71-2.50)	0.5614	0.5764	0.3346	0.3565
BCAC§	11p15.5	rs2107425	98	1460	2463	0.71 (0.62-0.82)	0.88 (0.70-1.10)	1.28e-05	2.17e-05	0.0012	0.002
BCAC§	12p11.22	rs7313833	98	1460	2457	1.08 (0.94-1.24)	1.08 (0.87-1.34)	0.5282	0.5441	0.3209	0.3434
BCAC§	FLJ41481	rs4666451	98	1454	2469	0.96 (0.83-1.11)	1.03 (0.85-1.25)	0.7533	0.7633	0.926	0.9294
BCAC§	HCN1	rs981782	96	1419	2432	1.12 (0.96-1.32)	1.05 (0.87-1.27)	0.3336	0.3508	0.5399	0.5582
BCAC§	LOC100131885	rs2981582	98	1463	2466	0.88 (0.76-1.02)	0.89 (0.73-1.09)	0.199	0.2145	0.1381	0.157
BCAC§	LSP1	rs3817198	97	1457	2435	1.16 (1.01-1.34)	1.40 (1.11-1.75)	0.0067	0.0085	0.0016	0.0026
BCAC§	TOX3	rs12443621	97	1445	2457	0.96 (0.82-1.12)	0.83 (0.69-1.01)	0.1534	0.1673	0.0752	0.0894
Cell cycle	CCND1	rs602652	99	1468	2493	1.13 (0.97-1.32)	1.24 (1.03-1.49)	0.0741	0.0838	0.0235	0.0307
Cell cycle	CCND1	rs3862792	98	1471	2468	0.83 (0.61-1.13)	0.91 (0.76-1.08)	0.4882	0.2368	0.2311	0.2531
Cell cycle	CCND1	rs603965	98	1476	2464	1.06 (0.91-1.23)	1.28 (1.06-1.55)	0.0267	0.0316	0.013	0.0178
Cell cycle	CCND1	rs3212879	99	1472	2491	0.85 (0.73-0.99)	0.82 (0.68-0.99)	0.0629	0.0717	0.0321	0.0409
Cell cycle	CCND1	rs3212891	98	1475	2476	0.86 (0.74-1.00)	0.83 (0.69-1.00)	0.0818	0.092	0.0376	0.0472
Cell cycle	CCND1	rs678653	98	1465	2468	0.94 (0.81-1.08)	0.93 (0.76-1.15)	0.631	0.6447	0.3791	0.4012
Cell cycle	CCND1	rs7178	99	1480	2491	1.24 (1.04-1.49)	1.24 (0.50-3.04)	0.0629	0.0716	0.0211	0.0278
Cell cycle	CCND2	rs3217795	99	1485	2500	1.00 (0.84-1.20)	0.71 (0.28-1.76)	0.7469	0.7573	0.819	0.8272
Cell cycle	CCND2	rs3217805	99	1458	2502	1.08 (0.93-1.25)	0.86 (0.70-1.05)	0.0625	0.0712	0.3599	0.3824
Cell cycle	CCND2	rs3217820	97	1407	2497	1.12 (0.97-1.29)	1.01 (0.82-1.25)	0.2744	0.2913	0.4954	0.5152
Cell cycle	CCND2	rs3217852	99	1474	2488	0.99 (0.86-1.14)	0.86 (0.64-1.15)	0.5804	0.5955	0.4711	0.4917
Cell cycle	CCND2	rs3217862	99	1470	2493	0.93 (0.80-1.08)	0.94 (0.62-1.40)	0.6107	0.6251	0.3481	0.3708
Cell cycle	CCND2	rs3217863	98	1459	2472	0.99 (0.83-1.20)	1.49 (0.75-2.93)	0.5176	0.5338	0.6464	0.6615
Cell cycle	CCND2	rs3217869	99	1483	2498	1.01 (0.87-1.16)	1.05 (0.87-1.28)	0.852	0.8585	0.6306	0.6465
Cell cycle	CCND2	rs3217901	99	1479	2489	1.10 (0.95-1.28)	1.03 (0.85-1.25)	0.4163	0.4338	0.5991	0.616
Cell cycle	CCND2	rs3217906	98	1467	2473	1.05 (0.91-1.20)	0.97 (0.74-1.28)	0.7562	0.7662	0.7711	0.7813
Cell cycle	CCND2	rs3217916	98	1476	2477	1.01 (0.88-1.16)	0.75 (0.58-0.97)	0.0672	0.0763	0.1541	0.1739
Cell cycle	CCND2	rs3217925	98	1470	2461	0.98 (0.86-1.13)	0.72 (0.54-0.96)	0.072	0.0814	0.1078	0.1248
Cell cycle	CCND2	rs3217926	99	1484	2500	1.05 (0.91-1.21)	0.90 (0.74-1.10)	0.2813	0.2987	0.5268	0.5461
Cell cycle	CCND2	rs3217933	98	1478	2474	1.13 (0.99-1.30)	1.01 (0.76-1.33)	0.1947	0.2103	0.241	0.2632
Cell cycle	CCND2	rs3217936	99	1478	2489	1.02 (0.89-1.17)	0.77 (0.61-0.97)	0.0461	0.0533	0.1303	0.1489
Cell cycle	CCND3	rs1410492	99	1479	2490	1.08 (0.94-1.24)	1.06 (0.80-1.40)	0.5163	0.5327	0.3187	0.3415
Cell cycle	CCND3	rs3218092	98	1468	2468	1.02 (0.89-1.18)	0.74 (0.51-1.06)	0.2119	0.2279	0.4626	0.4833
Cell cycle	CCND3	rs2479717	99	1472	2489	1.05 (0.91-1.20)	0.98 (0.76-1.25)	0.7622	0.772	0.7947	0.804
Cell cycle	CCND3	rs1051130	99	1475	2488	1.13 (0.96-1.31)	0.87 (0.72-1.05)	0.0088	0.011	0.2	0.2215
Cell cycle	CCND3	rs9529	99	1481	2475	1.00 (0.87-1.15)	0.79 (0.62-1.02)	0.1606	0.175	0.1898	0.2109
Cell cycle	CCND3	rs3218110	99	1479	2482	1.11 (0.97-1.28)	1.11 (0.83-1.47)	0.2854	0.3028	0.145	0.1644
Cell cycle	CCND3	rs3218114	99	1484	2492	1.01 (0.88-1.17)	0.78 (0.53-1.13)	0.3854	0.4032	0.5375	0.5565
Cell cycle	CCNE1	rs997669	99	1480	2497	1.10 (0.95-1.27)	1.14 (0.93-1.39)	0.3158	0.3335	0.1414	0.1607
Cell cycle	CCNE1	rs3218036	99	1476	2481	1.07 (0.93-1.23)	1.27 (1.01-1.59)	0.1126	0.1248	0.0458	0.0567
Cell cycle	CCNE1	rs3218038	99	1479	2497	0.97 (0.76-1.25)	1.90 (0.32-11.42)	0.7575	0.7675	0.9863	0.987
Cell cycle	CCNE1	rs3218076	99	1480	2497	1.02 (0.89-1.17)	1.02 (0.79-1.33)	0.9356	0.9386	0.7375	0.7492
Cell cycle	CDK2	rs2069408	99	1476	2496	0.90 (0.78-1.03)	0.89 (0.71-1.11)	0.2515	0.2684	0.1327	0.1515
Cell cycle	CDK2	rs1045435	99	1482	2497	1.11 (0.94-1.33)	1.87 (0.92-3.82)	0.1182	0.1307	0.0735	0.0879
Cell cycle	CDK4	rs2270777	99	1477	2491	1.07 (0.92-1.24)	1.07 (0.88-1.30)	0.6422	0.6557	0.4203	0.442
Cell cycle	CDK4	rs2069506	99	1480	2482	0.94 (0.82-1.08)	1.00 (0.81-1.24)	0.6509	0.6642	0.6775	0.6915
Cell cycle	CDK6	rs8179	97	1465	2440	0.96 (0.84-1.11)	1.07 (0.78-1.48)	0.77	0.7794	0.9164	0.9202
Cell cycle	CDK6	rs2285332	98	1476	2463	0.92 (0.80-1.06)	0.88 (0.66-1.17)	0.3974	0.415	0.1799	0.2006
Cell cycle	CDK6	rs42046	97	1466	2446	1.07 (0.93-1.23)	1.07 (0.82-1.39)	0.6065	0.6207	0.3659	0.3881
Cell cycle	CDK6	rs3731348	98	1463	2465	1.08 (0.88-1.32)	0.39 (0.11-1.39)	0.2229	0.2391	0.9009	0.9054
Cell cycle	CDK6	rs8	99	1473	2481	1.17 (1.02-1.35)	1.44 (1.04-1.99)	0.0152	0.0185	0.0039	0.0059
Cell cycle	CDK6	rs2237570	98	1474	2468	0.89 (0.76-1.06)	0.71 (0.38-1.33)	0.2478	0.2645	0.1015	0.1182
Cell cycle	CDK6	rs3731343	99	1484	2499	1.04 (0.89-1.21)	1.09 (0.90-1.31)	0.6611	0.6741	0.3637	0.3863
Cell cycle	CDK6	rs3757823	99	1486	2495	1.05 (0.89-1.24)	1.09 (0.53-2.23)	0.8238	0.8314	0.534	0.553
Cell cycle	CDK6	rs2079147	99	1481	2496	1.01 (0.86-1.18)	1.01 (0.84-1.22)	0.9955	0.9957	0.9246	0.928
Cell cycle	CDK6	rs2282991	96	1449	2404	0.85 (0.71-1.01)	0.86 (0.44-1.69)	0.1573	0.1712	0.0626	0.0753
Cell cycle	CDK6	rs4729049	99	1482	2499	1.01 (0.85-1.19)	0.86 (0.44-1.69)	0.9031	0.9075	0.9082	0.9125
Cell cycle	CDK6	rs445	99	1481	2497	0.99 (0.83-1.17)	0.89 (0.44-1.78)	0.9334	0.9365	0.7706	0.7809
Cell cycle	CDK6	rs992519	99	1477	2496	1.05 (0.90-1.22)	0.99 (0.62-1.59)	0.8398	0.8468	0.6382	0.6538
Cell cycle	CDKN1A	rs762624	99	1475	2483	1.06 (0.92-1.21)	1.11 (0.86-1.44)	0.5868	0.6017	0.3019	0.3247
Cell cycle	CDKN1A	rs2395655	99	1478	2487	1.12 (0.97-1.29)	1.18 (0.97-1.43)	0.1753	0.1903	0.0692	0.083
Cell cycle	CDKN1A	rs3176331	98	1471	2472	1.01 (0.86-1.18)	1.14 (0.70-1.85)	0.8645	0.8704	0.7129	0.7255
Cell cycle	CDKN1A	rs3176336	99	1481	2488	0.98 (0.85-1.14)	0.94 (0.77-1.14)	0.798	0.8066	0.5351	0.5541
Cell cycle	CDKN1A	rs3176343	99	1483	2491	1.03 (0.83-1.28)	0.78 (0.14-4.37)	0.915	0.9188	0.8189	0.8272
Cell cycle	CDKN1A	rs1801270	98	1477	2463	0.91 (0.75-1.11)	0.53 (0.19-1.50)	0.3081	0.3256	0.1987	0.22
Cell cycle	CDKN1A	rs3176352	98	1477	2476	1.03 (0.89-1.18)	1.17 (0.91-1.50)	0.4833	0.5001	0.2978	0.3205
Cell cycle	CDKN1A	rs1059234	99	1483	2481	0.90 (0.74-1.09)	0.73 (0.29-1.83)	0.4576	0.4748	0.2182	0.2401
Cell cycle	CDKN1A	rs6457937	99	1483	2495	0.97 (0.72-1.30)	0.90 (0.76-1.08)	0.9762	0.8283	0.8263	0.8342
Cell cycle	CDKN1B	rs3759217	99	1483	2492	1.15 (0.98-1.34)	1.04 (0.60-1.79)	0.2388	0.2555	0.1301	0.1487
Cell cycle	CDKN1B	rs34330	98	1468	2467	0.94 (0.81-1.08)	0.90 (0.67-1.20)	0.549	0.5646	0.2774	0.3
Cell cycle	CDKN1B	rs2066827	99	1481	2484	0.88 (0.77-1.01)	0.68 (0.51-0.90)	0.0108	0.0133	0.0035	0.0053
Cell cycle	CDKN1B	rs34329	99	1481	2491	1.01 (0.88-1.16)	0.96 (0.76-1.21)	0.9175	0.9213	0.8616	0.868
Cell cycle	CDKN1B	rs3093736	99	1483	2493	0.94 (0.72-1.23)	1.53 (0.25-9.44)	0.8128	0.8208	0.7519	0.763
Cell cycle	CDKN1B	rs7330	99	1484	2499	0.95 (0.82-1.09)	1.01 (0.83-1.23)	0.6676	0.6805	0.8981	0.9028
Cell cycle	CDKN1B	rs1420023	99	1475	2486	0.95 (0.81-1.13)	1.08 (0.59-1.97)	0.8314	0.8386	0.7146	0.7272
Cell cycle	CDKN2A	rs3217992	99	1474	2489	0.96 (0.83-1.10)	0.91 (0.74-1.13)	0.6761	0.6887	0.3764	0.3987
Cell cycle	CDKN2A	rs3218005	98	1461	2473	1.04 (0.87-1.24)	1.63 (0.87-3.05)	0.2975	0.3149	0.2853	0.3079
Cell cycle	CDKN2A	rs2811712	99	1479	2494	0.97 (0.82-1.15)	1.91 (1.08-3.37)	0.0792	0.0893	0.4497	0.4709
Cell cycle	CDKN2A	rs3218020	98	1467	2463	0.99 (0.86-1.14)	0.93 (0.74-1.17)	0.8316	0.8388	0.6253	0.6412
Cell cycle	CDKN2A	rs3731197	99	1476	2479	1.02 (0.88-1.17)	1.07 (0.87-1.30)	0.8252	0.8327	0.5644	0.5824
Cell cycle	CDKN2A	rs3731211	99	1476	2484	0.95 (0.83-1.09)	1.06 (0.82-1.37)	0.6308	0.6446	0.8613	0.8676
Cell cycle	CDKN2A	rs3731222	99	1480	2497	1.01 (0.87-1.19)	0.82 (0.50-1.36)	0.7172	0.7285	0.8169	0.8252
Cell cycle	CDKN2A	rs4074785	98	1471	2464	1.04 (0.88-1.24)	1.30 (0.68-2.47)	0.6662	0.679	0.4466	0.4677
Cell cycle	CDKN2A	rs3731239	99	1478	2487	1.08 (0.94-1.24)	1.08 (0.88-1.33)	0.5407	0.5566	0.324	0.3468
Cell cycle	CDKN2A	rs3731249	98	1464	2452	0.86 (0.64-1.16)	1.03 (0.23-4.67)	0.6066	0.6208	0.3584	0.3806
Cell cycle	CDKN2A	rs11515	99	1479	2492	1.00 (0.86-1.16)	1.53 (0.98-2.41)	0.1782	0.1933	0.3809	0.4032
Cell cycle	CDKN2A	rs3088440	99	1475	2490	1.02 (0.86-1.21)	1.33 (0.65-2.70)	0.7247	0.7358	0.6122	0.6287
Cell cycle	CDKN2A	rs3731257	99	1480	2476	0.89 (0.78-1.03)	0.80 (0.60-1.07)	0.1345	0.1478	0.0452	0.056
Cell cycle	CDKN2B	rs3217986	99	1478	2486	1.04 (0.88-1.24)	1.23 (0.64-2.37)	0.7405	0.7511	0.4832	0.5035
Cell cycle	CDKN2B	rs1063192	99	1476	2491	1.01 (0.87-1.17)	0.98 (0.81-1.19)	0.9549	0.957	0.8927	0.8976
Cell cycle	CDKN2B	rs3218009	98	1469	2478	0.93 (0.80-1.09)	1.25 (0.77-2.02)	0.4314	0.4488	0.7664	0.7768
Cell cycle	CDKN2B	rs3218012	98	1464	2477	0.96 (0.83-1.12)	0.96 (0.79-1.16)	0.8698	0.8755	0.6371	0.6526
Cell cycle	CDKN2C	rs12855	99	1482	2499	0.98 (0.83-1.17)	1.30 (0.68-2.51)	0.7143	0.7257	0.8688	0.8748
Cell cycle	CDKN2C	rs3176459	98	1466	2480	1.06 (0.92-1.22)	0.93 (0.75-1.16)	0.4257	0.4431	0.9162	0.92
Cell cycle	CDKN2D	rs1465702	99	1483	2481	1.12 (0.89-1.41)	0.65 (0.13-3.33)	0.5541	0.5697	0.4518	0.4729
Cell cycle	CDKN2D	rs3218222	98	1468	2459	0.97 (0.85-1.12)	1.04 (0.78-1.38)	0.8812	0.8864	0.9412	0.9439
Cell cycle	RB1	rs1981434	98	1463	2460	0.97 (0.85-1.12)	1.01 (0.79-1.30)	0.9172	0.9209	0.8937	0.8985
Cell cycle	RB1	rs2854345	99	1476	2480	1.02 (0.88-1.17)	1.02 (0.73-1.43)	0.9738	0.975	0.8221	0.8301
Cell cycle	RB1	rs399413	82	1314	1989	1.02 (0.88-1.19)	1.15 (0.88-1.51)	0.6005	0.6127	0.3906	0.4093
Cell cycle	RB1	rs4151540	98	1469	2455	0.91 (0.79-1.04)	1.03 (0.80-1.33)	0.3233	0.3407	0.5165	0.5358
Cell cycle	RB1	rs4151551	99	1472	2487	1.08 (0.90-1.29)	1.16 (0.58-2.31)	0.6711	0.6838	0.3718	0.3941
Cell cycle	RB1	rs2854344	82	1304	1975	0.73 (0.59-0.91)	1.84 (0.78-4.32)	0.0062	0.0076	0.0552	0.0653
Cell cycle	RB1	rs425834	98	1472	2469	1.04 (0.80-1.37)	2.59 (0.71-9.43)	0.3273	0.3448	0.3967	0.4186
Cell cycle	RB1	rs4151611	98	1463	2476	0.87 (0.69-1.10)	1.03 (0.33-3.23)	0.5183	0.5345	0.2988	0.3214
Cell cycle	RB1	rs4151620	81	1300	1958	1.12 (0.95-1.33)	0.22 (0.08-0.62)	0.0011	0.0014	0.9699	0.9711
Cell cycle	RB1	rs3092904	82	1317	1993	0.96 (0.83-1.12)	1.09 (0.82-1.45)	0.6845	0.6948	0.953	0.9549
Cell cycle	RB1	rs4151636	99	1467	2489	0.87 (0.69-1.10)	0.81 (0.19-3.43)	0.4713	0.4882	0.2213	0.2432
Cell cycle	STK15	rs732417	88	1397	2139	1.12 (0.92-1.35)	1.32 (0.55-3.15)	0.4566	0.472	0.2128	0.2324
Cell cycle	STK15	rs1047972	93	1439	2286	0.97 (0.83-1.13)	0.90 (0.60-1.35)	0.8159	0.8233	0.5405	0.5583
Cell cycle	STK15	rs2273535	81	1333	1917	1.15 (0.99-1.34)	1.20 (0.87-1.66)	0.1326	0.1434	0.0515	0.0611
Cell cycle	STK15	rs8173	86	1338	2103	1.01 (0.88-1.17)	1.29 (0.94-1.76)	0.2891	0.3042	0.2747	0.2945
DNA repair	BRCA1	rs799917	89	1414	2157	1.16 (1.01-1.34)	1.09 (0.87-1.37)	0.1214	0.1328	0.1299	0.1467
DNA repair	BRCA1	rs1799950	58	1036	1275	1.04 (0.81-1.34)	0.30 (0.03-2.72)	0.4772	0.4871	0.9818	0.9823
DNA repair	BRIP	rs11871785	99	1478	2488	1.05 (0.91-1.21)	0.96 (0.78-1.18)	0.6433	0.6568	0.9737	0.9749
DNA repair	BRIP	rs1557720	82	1317	1987	1.06 (0.91-1.24)	1.17 (0.95-1.45)	0.3336	0.3484	0.1434	0.1596
DNA repair	BRIP	rs11652980	99	1476	2495	1.02 (0.82-1.28)	1.17 (0.31-4.44)	0.9561	0.9582	0.7972	0.8064
DNA repair	BRIP	rs2191249	82	1313	1970	0.94 (0.81-1.09)	0.76 (0.56-1.02)	0.1571	0.1689	0.0798	0.0921
DNA repair	BRIP	rs16945628	99	1481	2488	0.93 (0.81-1.06)	0.90 (0.73-1.12)	0.4621	0.4792	0.2309	0.2531
DNA repair	BRIP	rs2191248	98	1469	2482	1.00 (0.87-1.15)	1.20 (0.97-1.49)	0.2009	0.2166	0.2147	0.2364
DNA repair	BRIP	rs16945643	99	1471	2486	0.97 (0.81-1.17)	1.83 (0.76-4.38)	0.3798	0.3975	0.8358	0.8433
DNA repair	BRIP	rs6504074	80	1294	1918	0.94 (0.81-1.09)	0.85 (0.65-1.12)	0.4439	0.458	0.208	0.2257
DNA repair	BRIP	rs2378908	81	1287	1982	1.10 (0.93-1.30)	1.18 (0.70-2.00)	0.4578	0.472	0.2122	0.2303
DNA repair	BRIP	rs4988344	82	1315	1992	1.09 (0.93-1.28)	1.43 (0.94-2.18)	0.1655	0.1777	0.0777	0.09
DNA repair	BRIP	rs9908659	99	1478	2488	0.98 (0.85-1.14)	1.08 (0.88-1.32)	0.658	0.6711	0.6005	0.6174
DNA repair	BRIP	rs4968451	99	1477	2489	1.06 (0.91-1.23)	1.38 (0.93-2.06)	0.2376	0.2542	0.1459	0.1653
DNA repair	BRIP	rs2048718	98	1459	2482	0.94 (0.81-1.10)	1.04 (0.86-1.25)	0.525	0.5411	0.8081	0.8167
DNA repair	NBS1	rs1063045	94	1453	2305	0.99 (0.86-1.15)	0.93 (0.74-1.16)	0.7953	0.8035	0.5945	0.6107
DNA repair	NBS1	rs1805794	92	1423	2267	1.00 (0.87-1.16)	0.85 (0.68-1.07)	0.3328	0.3493	0.3049	0.3262
DNA repair	NBS1	rs709816	93	1448	2273	1.03 (0.89-1.19)	0.96 (0.78-1.18)	0.7897	0.798	0.8746	0.88
DNA repair	NBS1	rs1061302	84	1333	2035	1.02 (0.88-1.18)	0.89 (0.70-1.12)	0.5114	0.5254	0.5305	0.5469
DNA repair	RAD51	rs1801320	87	1399	2092	1.08 (0.88-1.33)	1.51 (0.60-3.76)	0.5323	0.5465	0.3156	0.3357
DNA repair	RAD51	rs1801321	85	1412	1986	1.02 (0.87-1.18)	1.21 (0.99-1.48)	0.1394	0.151	0.0985	0.1127
DNA repair	RAD52	rs11226	93	1449	2293	1.17 (1.00-1.37)	1.03 (0.85-1.24)	0.1	0.1108	0.6166	0.6321
DNA repair	XRCC2	XRCC212	83	1364	1959	0.95 (0.75-1.20)	1.03 (0.35-2.98)	0.9044	0.908	0.6961	0.7074
DNA repair	XRCC2	rs3218384	89	1426	2160	1.00 (0.86-1.15)	0.99 (0.72-1.38)	0.9994	0.9994	0.9722	0.9734
DNA repair	XRCC2	rs3218536	78	1337	1787	0.88 (0.72-1.08)	0.23 (0.07-0.79)	0.0142	0.0166	0.0364	0.0439
DNA repair	XRCC3	rs1799794	94	1461	2307	1.07 (0.93-1.24)	0.66 (0.44-0.98)	0.0521	0.0595	0.6996	0.7122
DNA repair	XRCC3	rs1799796	94	1461	2299	0.92 (0.80-1.06)	1.12 (0.90-1.39)	0.1939	0.2086	0.8358	0.8429
DNA repair	XRCC3	rs861539	84	1332	2024	0.91 (0.78-1.06)	0.91 (0.73-1.14)	0.4402	0.4549	0.2705	0.2898
Mismatch	MLH1	rs1800734	81	1299	1957	0.95 (0.82-1.11)	1.07 (0.76-1.49)	0.7295	0.7385	0.8455	0.8513
Mismatch	MLH1	rs1540354	81	1305	1960	1.05 (0.90-1.23)	1.10 (0.76-1.60)	0.7626	0.7707	0.4616	0.4789
Mismatch	MLH1	rs1799977	56	1017	1238	1.07 (0.90-1.28)	0.96 (0.72-1.28)	0.6468	0.6546	0.8334	0.8379
Mismatch	MLH1	rs2286939	84	1318	2051	1.05 (0.89-1.23)	0.98 (0.80-1.20)	0.7202	0.7298	0.9276	0.9304
Mismatch	MLH3	rs7303	79	1281	1906	1.03 (0.87-1.22)	1.08 (0.89-1.32)	0.7289	0.7378	0.4363	0.4537
Mismatch	MLH3	rs175080	82	1296	1981	0.97 (0.82-1.14)	0.89 (0.73-1.10)	0.5484	0.5614	0.2971	0.3161
Mismatch	MSH2	rs4952887	82	1302	1975	0.82 (0.67-1.00)	1.24 (0.63-2.44)	0.1092	0.1191	0.1534	0.1698
Mismatch	MSH2	rs13425206	99	1475	2491	0.94 (0.73-1.22)	1.06 (0.33-3.39)	0.8933	0.898	0.698	0.7113
Mismatch	MSH2	rs3771274	82	1304	1978	1.02 (0.88-1.20)	1.01 (0.81-1.25)	0.9531	0.9549	0.8708	0.8757
Mismatch	MSH2	rs1981928	83	1314	2001	1.00 (0.86-1.16)	0.88 (0.67-1.15)	0.6065	0.6187	0.5225	0.5388
Mismatch	MSH2	rs2059520	82	1312	1981	1.03 (0.88-1.19)	1.00 (0.80-1.26)	0.9447	0.9468	0.884	0.8885
Mismatch	MSH2	rs2303428	84	1317	2047	0.90 (0.75-1.08)	0.59 (0.28-1.24)	0.205	0.2185	0.1071	0.1217
Mismatch	MSH3	rs6151662	98	1474	2461	1.02 (0.82-1.26)	0.27 (0.08-0.92)	0.0577	0.066	0.4541	0.475
Mismatch	MSH3	rs40139	83	1315	2026	1.17 (1.00-1.38)	0.96 (0.78-1.17)	0.0479	0.0541	0.9751	0.976
Mismatch	MSH3	rs26282	82	1308	1988	1.02 (0.88-1.19)	1.01 (0.76-1.33)	0.9538	0.9556	0.8299	0.8364
Mismatch	MSH3	rs26779	98	1475	2466	1.00 (0.87-1.16)	0.98 (0.80-1.19)	0.9554	0.9574	0.8493	0.8561
Mismatch	MSH3	rs33008	82	1227	1829	0.77 (0.32-1.87)	0.85 (0.35-2.07)	0.2108	0.2241	0.8039	0.8113
Mismatch	MSH3	rs10079641	98	1473	2470	1.10 (0.92-1.32)	0.67 (0.36-1.28)	0.2557	0.2725	0.7589	0.7696
Mismatch	MSH3	rs184967	92	1305	1983	1.01 (0.86-1.18)	1.04 (0.65-1.65)	0.9871	0.9876	0.8937	0.8978
Mismatch	MSH3	rs2897298	98	1465	2450	1.10 (0.94-1.29)	0.87 (0.50-1.52)	0.4182	0.4355	0.4274	0.4487
Mismatch	MSH3	rs26279	82	1301	2008	1.08 (0.93-1.25)	1.10 (0.85-1.42)	0.5511	0.5643	0.2922	0.3114
Mismatch	MSH3	rs2112416	82	1310	1985	0.99 (0.83-1.16)	1.14 (0.71-1.83)	0.8335	0.8395	0.8772	0.8819
Mismatch	MSH6	rs3136245	81	1310	1960	0.98 (0.84-1.14)	0.68 (0.47-0.99)	0.1178	0.1281	0.1573	0.1739
Mismatch	MSH6	rs3136272	97	1450	2425	0.92 (0.80-1.06)	1.02 (0.83-1.26)	0.4241	0.4412	0.7715	0.7815
Mismatch	MSH6	rs1800932	83	1317	2001	1.09 (0.93-1.28)	1.01 (0.70-1.45)	0.5452	0.5585	0.4088	0.4273
Mismatch	MSH6	rs2348244	80	1279	1940	1.07 (0.90-1.26)	0.65 (0.40-1.05)	0.1262	0.1367	0.727	0.7369
Mismatch	MSH6	rs3136317	99	1476	2490	1.10 (0.95-1.27)	1.08 (0.70-1.68)	0.4429	0.4602	0.227	0.2491
Mismatch	MSH6	rs1800935	83	1316	2026	1.04 (0.90-1.20)	1.03 (0.79-1.33)	0.883	0.8874	0.6797	0.6916
Mismatch	MSH6	rs2020911	81	1306	1950	1.05 (0.90-1.22)	0.90 (0.72-1.12)	0.3677	0.3824	0.5504	0.5658
Mismatch	PMS1	rs3762545	83	1308	2018	0.94 (0.81-1.10)	0.81 (0.56-1.18)	0.4485	0.4631	0.2317	0.2505
Mismatch	PMS1	rs5742981	90	1300	2299	0.94 (0.72-1.23)	0.36 (0.04-3.10)	0.5245	0.5393	0.4592	0.4783
Mismatch	PMS1	rs5741593	97	1462	2447	0.87 (0.71-1.07)	0.63 (0.20-2.00)	0.2997	0.317	0.1275	0.1457
Mismatch	PMS1	rs1233291	82	1309	1977	0.89 (0.77-1.03)	0.84 (0.63-1.12)	0.2061	0.2193	0.08	0.0924
Mismatch	PMS1	rs1233255	79	1271	1905	1.03 (0.88-1.21)	0.79 (0.55-1.13)	0.3625	0.3768	0.6249	0.6378
Mismatch	PMS1	rs1233258	82	1305	1969	0.91 (0.79-1.06)	0.94 (0.72-1.22)	0.4926	0.5064	0.3118	0.3307
Mismatch	PMS1	rs256571	99	1475	2484	1.02 (0.83-1.25)	0.41 (0.09-1.97)	0.4778	0.4947	0.8635	0.8697
Mismatch	PMS1	rs256563	98	1456	2446	2.50 (0.99-6.33)	2.15 (0.84-5.48)	0.1211	0.1336	0.04	0.05
Mismatch	PMS2	rs7797466	82	1305	1968	1.18 (1.01-1.38)	1.38 (0.96-2.00)	0.0387	0.044	0.0108	0.0142
Mismatch	PMS2	rs2345060	82	1319	1987	1.02 (0.88-1.18)	0.82 (0.59-1.12)	0.3978	0.4126	0.5412	0.557
Mismatch	PMS2	rs2286680	83	1316	2026	1.09 (0.92-1.28)	1.13 (0.68-1.88)	0.5752	0.588	0.2972	0.3165
Mismatch	PMS2	rs12112229	81	1299	1945	0.95 (0.82-1.10)	1.15 (0.86-1.54)	0.4318	0.4461	0.8827	0.8872
Mismatch	PMS2	rs1805321	82	1317	1980	0.85 (0.73-1.00)	0.93 (0.75-1.14)	0.1401	0.1514	0.2586	0.2775
Mismatch	PMS2	rs2228006	98	1467	2478	1.01 (0.87-1.18)	1.24 (0.77-2.00)	0.6691	0.6818	0.5728	0.5905
MMCT-18*	AIFM2	rs2394655	75	1037	1983	1.11 (0.83-1.49)	0.52 (0.06-4.50)	0.6299	0.6405	0.6144	0.6282
MMCT-18*	AIFM2	rs7908957	74	1017	1939	0.84 (0.70-1.02)	1.16 (0.67-2.02)	0.162	0.1729	0.2381	0.2529
MMCT-18*	AIFM2	rs1053495	67	958	1741	0.91 (0.72-1.16)	0.44 (0.14-1.32)	0.2229	0.234	0.1832	0.1945
MMCT-18*	AIFM2	rs2894111	74	1046	1925	0.96 (0.81-1.12)	0.75 (0.56-1.01)	0.1659	0.1769	0.1055	0.1173
MMCT-18*	AIFM2	rs2394656	39	440	1134	0.88 (0.69-1.12)	0.80 (0.41-1.55)	0.4881	0.4948	0.2354	0.2415
MMCT-18*	AIFM2	rs6480440	39	422	1140	1.01 (0.79-1.29)	0.90 (0.56-1.44)	0.8917	0.8937	0.7992	0.8026
MMCT-18*	AIFM2	rs2280201	76	1041	1996	1.04 (0.87-1.26)	0.81 (0.44-1.50)	0.6995	0.7086	0.96	0.9614
MMCT-18*	AIFM2	rs10999147	76	1049	2017	1.10 (0.89-1.36)	0.73 (0.19-2.82)	0.5933	0.6048	0.4693	0.4866
MMCT-18*	AIFM2	rs3750772	75	1027	1995	1.04 (0.81-1.33)	0.99 (0.25-3.90)	0.9556	0.9572	0.7791	0.787
MMCT-18*	AIFM2	rs4295944	76	1047	2008	0.99 (0.84-1.17)	1.08 (0.87-1.34)	0.7314	0.7399	0.5842	0.5978
MMCT-18*	AIFM2	rs2394644	34	600	745	1.05 (0.81-1.37)	0.78 (0.35-1.74)	0.7561	0.7596	0.9997	0.9997
MMCT-18*	AIFM2	rs10999152	64	908	1672	1.17 (0.98-1.41)	1.11 (0.70-1.75)	0.2147	0.2252	0.1151	0.1279
MMCT-18*	AKTIP	rs9931702	40	441	1150	0.95 (0.74-1.22)	0.90 (0.66-1.24)	0.8129	0.8161	0.5203	0.528
MMCT-18*	AKTIP	rs17801966	31	348	898	0.92 (0.69-1.24)	0.90 (0.32-2.53)	0.8519	0.854	0.5794	0.5836
MMCT-18*	AKTIP	rs7189819	75	1034	1980	0.89 (0.76-1.04)	0.82 (0.63-1.06)	0.1796	0.1911	0.066	0.0754
MMCT-18*	AKTIP	rs3743772	38	413	1093	0.88 (0.60-1.28)	1.74 (0.29-10.48)	0.664	0.669	0.6778	0.6817
MMCT-18*	AXIN2	rs11868547	65	847	1764	0.95 (0.78-1.16)	0.92 (0.73-1.16)	0.7631	0.7696	0.463	0.4768
MMCT-18*	AXIN2	rs7591	74	1041	1921	1.12 (0.95-1.33)	1.04 (0.82-1.32)	0.3887	0.402	0.461	0.4769
MMCT-18*	AXIN2	rs4074947	74	1043	1946	1.09 (0.92-1.28)	0.98 (0.66-1.45)	0.5976	0.6088	0.5141	0.5294
MMCT-18*	AXIN2	rs7210356	76	1047	2019	1.11 (0.92-1.34)	0.84 (0.41-1.71)	0.4548	0.4682	0.443	0.4606
MMCT-18*	AXIN2	rs11655966	36	594	832	0.98 (0.79-1.23)	1.03 (0.68-1.57)	0.971	0.9715	0.9882	0.9884
MMCT-18*	AXIN2	rs4541111	35	594	830	1.24 (0.96-1.60)	1.10 (0.82-1.49)	0.2493	0.2554	0.5038	0.511
MMCT-18*	AXIN2	rs4791171	67	950	1735	1.08 (0.91-1.28)	1.20 (0.89-1.60)	0.4077	0.4197	0.1827	0.1976
MMCT-18*	AXIN2	rs11079571	36	603	831	1.08 (0.86-1.37)	1.68 (0.87-3.25)	0.2632	0.2694	0.1748	0.1831
MMCT-18*	AXIN2	rs3923087	75	1041	1961	1.03 (0.87-1.21)	1.37 (0.95-1.98)	0.2399	0.2525	0.2081	0.2255
MMCT-18*	AXIN2	rs3923086	75	1039	1990	1.01 (0.86-1.20)	1.13 (0.91-1.42)	0.5163	0.5289	0.329	0.3467
MMCT-18*	CASP5	rs518604	76	1041	2029	1.11 (0.93-1.33)	1.27 (1.02-1.58)	0.0987	0.1075	0.032	0.0387
MMCT-18*	CASP5	rs523104	75	1017	2006	0.92 (0.77-1.10)	0.89 (0.71-1.11)	0.5182	0.5307	0.2633	0.2803
MMCT-18*	CASP5	rs3181328	75	1039	1981	0.98 (0.79-1.21)	0.63 (0.32-1.26)	0.4012	0.4147	0.3921	0.4072
MMCT-18*	CASP5	rs17446518	34	574	805	0.82 (0.62-1.08)	1.55 (0.56-4.30)	0.2311	0.2369	0.3641	0.3707
MMCT-18*	CASP5	rs9651713	74	1029	1959	1.02 (0.84-1.24)	1.39 (0.67-2.90)	0.6776	0.6871	0.5982	0.6117
MMCT-18*	CASP5	rs3181175	76	1046	2001	0.91 (0.77-1.07)	1.14 (0.74-1.76)	0.3906	0.4043	0.5699	0.5832
MMCT-18*	CASP5	rs3181174	76	1044	2006	0.85 (0.68-1.06)	0.93 (0.35-2.47)	0.3443	0.358	0.1687	0.1814
MMCT-18*	CASP5	rs2282657	67	958	1739	0.97 (0.82-1.15)	1.01 (0.78-1.32)	0.9233	0.9257	0.9472	0.9488
MMCT-18*	CASP5	rs507879	75	1038	1957	1.04 (0.85-1.27)	1.05 (0.85-1.31)	0.883	0.887	0.6488	0.6603
MMCT-18*	FILIP1	rs796977	40	437	1166	1.11 (0.88-1.40)	1.28 (0.91-1.81)	0.3441	0.3514	0.1458	0.1548
MMCT-18*	FILIP1	rs793477	66	944	1705	0.92 (0.76-1.12)	0.72 (0.37-1.40)	0.4562	0.4678	0.2396	0.2528
MMCT-18*	FILIP1	rs793446	76	1045	1997	1.06 (0.90-1.26)	1.10 (0.88-1.38)	0.6471	0.6575	0.359	0.3766
MMCT-18*	FILIP1	rs3921767	75	1040	1956	1.10 (0.88-1.37)	0.74 (0.26-2.13)	0.6014	0.6125	0.5993	0.613
MMCT-18*	FILIP1	rs17338680	77	1046	2027	1.05 (0.87-1.28)	0.70 (0.37-1.32)	0.4363	0.4499	0.8847	0.8887
MMCT-18*	FILIP1	rs9864437	76	1047	2009	0.95 (0.80-1.11)	1.15 (0.83-1.60)	0.4967	0.5096	0.9395	0.9417
MMCT-18*	FILIP1	rs6788750	57	711	1593	0.99 (0.82-1.21)	0.91 (0.70-1.18)	0.734	0.7404	0.523	0.5341
MMCT-18*	FILIP1	rs12494994	75	1038	1971	1.13 (0.95-1.33)	0.98 (0.63-1.52)	0.3802	0.3938	0.3168	0.3352
MMCT-18*	RBBP8	rs7239066	76	1040	1993	0.81 (0.67-0.98)	1.20 (0.62-2.32)	0.0772	0.0848	0.1062	0.117
MMCT-18*	RBBP8	rs11082221	76	1038	1991	1.00 (0.74-1.34)	1.23 (0.29-5.24)	0.9621	0.9628	0.9388	0.942
MMCT-18*	RBBP8	rs4474794	74	1033	1947	0.93 (0.79-1.10)	0.95 (0.75-1.21)	0.6901	0.6993	0.5173	0.5318
MMCT-18*	RBBP8	rs9304261	31	346	888	1.08 (0.82-1.40)	0.66 (0.38-1.15)	0.2276	0.2328	0.5163	0.5212
MMCT-18*	RGC32	rs10467472	74	1045	1943	1.04 (0.87-1.26)	1.24 (0.70-2.17)	0.703	0.7119	0.4527	0.4696
MMCT-18*	RGC32	rs3783194	68	956	1762	1.00 (0.82-1.22)	1.75 (0.85-3.59)	0.3203	0.3325	0.4929	0.5077
MMCT-18*	RGC32	rs11618371	76	1047	2009	1.04 (0.85-1.26)	1.40 (0.70-2.80)	0.6205	0.6314	0.4719	0.489
MMCT-18*	RGC32	rs9532824	75	1051	1949	0.88 (0.71-1.10)	0.42 (0.14-1.24)	0.1284	0.1382	0.0912	0.1003
MMCT-18*	RGC32	rs995845	76	1040	1995	1.01 (0.86-1.19)	1.16 (0.85-1.58)	0.6506	0.6608	0.4767	0.493
MMCT-18*	RGC32	rs9594551	74	1043	1929	0.95 (0.80-1.14)	1.20 (0.70-2.06)	0.6932	0.7024	0.9182	0.921
MMCT-18*	RGC32	rs975590	75	1033	1994	1.00 (0.85-1.18)	0.76 (0.53-1.08)	0.2776	0.2909	0.3487	0.3652
MMCT-18*	RUVBL1	rs9860614	76	1039	2012	1.04 (0.86-1.25)	1.43 (0.83-2.45)	0.4212	0.4348	0.3153	0.3344
MMCT-18*	RUVBL1	rs13063604	34	564	785	1.23 (0.98-1.56)	1.54 (1.00-2.39)	0.0556	0.0583	0.016	0.0181
MMCT-18*	RUVBL1	rs3732402	76	1045	2005	1.24 (1.05-1.46)	1.17 (0.93-1.48)	0.0388	0.0437	0.0554	0.0649
MMCT-18*	RUVBL1	rs7650365	75	1009	2010	1.17 (0.97-1.40)	0.87 (0.70-1.09)	0.0102	0.012	0.2912	0.3085
MMCT-18*	RUVBL1	rs4857836	77	1049	2031	1.08 (0.93-1.27)	1.13 (0.83-1.54)	0.5106	0.5235	0.2526	0.2708
MMCT-18*	RUVBL1	rs9821568	75	1028	1971	1.02 (0.86-1.22)	1.10 (0.65-1.85)	0.9163	0.9192	0.6988	0.7092
MMCT-18*	STAG3	rs11762932	76	1047	2007	0.96 (0.82-1.13)	1.00 (0.71-1.41)	0.8895	0.8933	0.7446	0.7533
MMCT-18*	STAG3	rs2246713	35	591	824	0.88 (0.68-1.14)	0.89 (0.66-1.20)	0.6061	0.6114	0.4251	0.4329
MMCT-18*	STAG3	rs1637001	76	1047	2005	0.83 (0.71-0.97)	0.88 (0.65-1.18)	0.0696	0.0768	0.0512	0.0592
OCAC§	11q13.2	rs7931342	98	1466	2474	0.94 (0.80-1.11)	0.93 (0.77-1.12)	0.6871	0.6992	0.4153	0.4369
OCAC§	17q22	rs7501993	97	1454	2456	0.90 (0.78-1.05)	1.02 (0.84-1.24)	0.275	0.292	0.8645	0.8706
OCAC§	17q24.3	rs1859962	97	1446	2464	1.01 (0.86-1.19)	0.98 (0.81-1.18)	0.9166	0.9203	0.8063	0.815
OCAC§	3p12.1	rs2660753	96	1437	2428	1.14 (0.96-1.36)	1.53 (0.80-2.94)	0.1609	0.175	0.0628	0.0755
OCAC§	8q24.21	rs7000448	98	1472	2453	1.09 (0.95-1.26)	0.96 (0.78-1.19)	0.3258	0.3433	0.8229	0.8308
OCAC§	Xp11.22	rs5945619	98	1457	2479	1.00 (0.87-1.15)	1.08 (0.88-1.33)	0.7387	0.7493	0.56	0.5781
OCAC§	ABL1	rs2855192	98	1470	2470	0.98 (0.84-1.15)	1.76 (1.07-2.88)	0.0788	0.0888	0.3501	0.3726
OCAC§	BRCA2	rs144848	93	1459	2294	0.94 (0.82-1.08)	1.03 (0.79-1.33)	0.6156	0.6291	0.6796	0.6929
OCAC§	CDC2	rs2448343	96	1448	2420	1.04 (0.90-1.20)	0.95 (0.77-1.17)	0.664	0.6766	0.839	0.8462
OCAC§	CDK7	rs12656449	98	1471	2476	1.02 (0.85-1.22)	0.75 (0.34-1.66)	0.744	0.7544	0.9306	0.9338
OCAC§	CRCAC	rs10795668	96	1428	2417	1.02 (0.89-1.17)	0.92 (0.73-1.16)	0.6991	0.7107	0.7112	0.7235
OCAC§	CRCAC	rs16892766	96	1439	2425	1.17 (0.98-1.41)	0.91 (0.42-1.95)	0.2269	0.2429	0.1575	0.177
OCAC§	CTBP2	rs12769019	56	996	1259	0.94 (0.79-1.12)	1.24 (0.91-1.69)	0.2327	0.2421	0.6017	0.6116
OCAC§	DESP-1979	rs16901979	97	1463	2428	0.98 (0.75-1.27)	0.96 (0.16-5.86)	0.9832	0.9839	0.8539	0.8605
OCAC§	DNMT3A	rs13420827	98	1462	2473	0.96 (0.83-1.11)	1.13 (0.82-1.56)	0.6398	0.6533	0.9359	0.9388
OCAC§	DPYD	rs1801265	97	1464	2444	1.00 (0.87-1.15)	1.05 (0.76-1.45)	0.9524	0.9546	0.8433	0.8503
OCAC§	E2F2	rs760607	96	1251	2109	2.94 (1.38-6.23)	2.91 (1.37-6.15)	0.9445	0.947	0.8924	0.8972
OCAC§	E2F3	rs7760528	98	1462	2465	1.03 (0.90-1.18)	0.92 (0.74-1.16)	0.6428	0.6562	0.7598	0.7704
OCAC§	EHBP1	rs2710646	95	1454	2355	0.94 (0.81-1.08)	1.32 (0.95-1.83)	0.1399	0.1529	0.7223	0.7342
OCAC§	ESR1	rs712221	97	1445	2454	1.08 (0.93-1.25)	1.12 (0.92-1.37)	0.4376	0.4547	0.2115	0.233
OCAC§	ESR1	rs9322336	98	1453	2464	0.81 (0.70-0.93)	0.73 (0.52-1.02)	0.005	0.0064	0.0013	0.0021
OCAC§	FANCE	rs2395626	98	1460	2480	1.06 (0.91-1.23)	0.98 (0.81-1.18)	0.5969	0.6114	0.971	0.9723
OCAC§	5q35.3	SNP4	95	1461	2370	1.04 (0.90-1.20)	1.02 (0.83-1.25)	0.8408	0.8475	0.7217	0.7336
OCAC§	5q35.3	SNP3	95	1462	2371	0.96 (0.82-1.12)	0.90 (0.74-1.09)	0.5578	0.5728	0.2835	0.3055
OCAC§	5q35.3	SNP2	95	1467	2359	0.96 (0.84-1.11)	0.75 (0.56-1.00)	0.1371	0.1501	0.1085	0.1251
OCAC§	5q35.3	SNP1	97	1475	2411	0.92 (0.80-1.06)	0.82 (0.58-1.14)	0.2951	0.3122	0.1207	0.1384
OCAC§	GALNTL2	rs2271077	98	1460	2479	0.96 (0.77-1.21)	0.97 (0.24-3.97)	0.9463	0.9488	0.7433	0.7546
OCAC§	11p15.5	SNP3	96	1457	2396	0.87 (0.75-1.01)	0.85 (0.61-1.17)	0.1275	0.1402	0.0503	0.0616
OCAC§	11p15.5	SNP2	96	1459	2407	1.20 (1.02-1.40)	1.20 (1.00-1.44)	0.0611	0.0695	0.0473	0.0581
OCAC§	11p15.5	SNP1	97	1473	2402	0.84 (0.73-0.97)	0.86 (0.60-1.22)	0.0529	0.0606	0.0243	0.0314
OCAC§	IL18	rs1834481	97	1449	2435	0.89 (0.77-1.02)	0.77 (0.59-1.01)	0.074	0.0834	0.0227	0.0295
OCAC§	JAZF1	rs10486567	96	1456	2408	1.00 (0.87-1.14)	1.09 (0.83-1.45)	0.8117	0.8196	0.7233	0.7352
OCAC§	KLK3	rs2735839	98	1459	2481	0.92 (0.79-1.08)	1.38 (0.90-2.11)	0.1745	0.1894	0.9525	0.9547
OCAC§	KU70	rs132788	86	1382	2082	1.04 (0.90-1.21)	1.08 (0.87-1.36)	0.7356	0.745	0.4333	0.4522
OCAC§	LIG4	rs1805386	98	1462	2466	1.08 (0.93-1.26)	1.24 (0.85-1.83)	0.345	0.3626	0.1498	0.1693
OCAC§	LMTK2	rs6465657	97	1439	2454	0.94 (0.80-1.09)	1.00 (0.83-1.21)	0.6166	0.6305	0.9184	0.9221
OCAC§	MSMB	rs10993994	98	1454	2473	1.03 (0.89-1.19)	1.08 (0.88-1.32)	0.7516	0.7617	0.4583	0.479
OCAC§	MTHFD1	rs1950902	97	1451	2458	0.97 (0.84-1.12)	0.89 (0.62-1.27)	0.7656	0.7751	0.4952	0.515
OCAC§	MTHFS	rs17284990	96	1418	2416	0.98 (0.85-1.13)	1.06 (0.79-1.44)	0.861	0.8669	0.9714	0.9727
OCAC§	NRIP1	rs2822986	98	1458	2458	1.03 (0.89-1.18)	0.89 (0.71-1.10)	0.4211	0.4384	0.5123	0.5317
OCAC§	PGR	rs10895068	97	1462	2413	1.00 (0.81-1.24)	0.49 (0.13-1.80)	0.5233	0.5391	0.7231	0.7351
OCAC§	PGR	rs1042838	95	1424	2408	1.25 (1.07-1.46)	1.09 (0.73-1.64)	0.0194	0.0232	0.0161	0.0215
OCAC§	PGR	rs608995	98	1475	2473	1.08 (0.94-1.24)	1.12 (0.84-1.48)	0.4948	0.5114	0.2427	0.265
OCAC§	SLC22A3	rs9364554	96	1449	2390	1.07 (0.93-1.24)	1.19 (0.94-1.51)	0.2984	0.3153	0.1223	0.1399
OCAC§	TGFB1	rs1982073	57	1026	1262	0.98 (0.82-1.17)	0.95 (0.74-1.23)	0.9296	0.9315	0.7069	0.7146
OCAC§	TNRC9	rs3803662	97	1456	2427	0.94 (0.82-1.08)	0.85 (0.65-1.11)	0.4014	0.4187	0.1849	0.2055
OCAC§	TP53	rs2287498	98	1459	2471	1.03 (0.86-1.24)	2.20 (0.95-5.08)	0.1799	0.1949	0.3145	0.3371
OCAC§	TP53	rs1042522	93	1459	2291	0.97 (0.84-1.11)	1.11 (0.85-1.45)	0.5854	0.5996	0.8221	0.8297
OCAC§	TP53	rs12951053	96	1428	2430	1.03 (0.86-1.24)	1.48 (0.71-3.11)	0.5628	0.5779	0.4635	0.4838
OCAC§	TP53	rs1625895	88	1409	2136	1.05 (0.89-1.24)	0.85 (0.48-1.51)	0.7088	0.7192	0.8096	0.8173
OCAC§	TP53	rs9894946	99	1470	2485	1.09 (0.94-1.27)	1.02 (0.65-1.58)	0.5111	0.5275	0.3293	0.3519
OCAC§	TYMS	rs495139	97	1433	2469	1.09 (0.94-1.26)	0.93 (0.76-1.14)	0.233	0.2492	0.8128	0.8212
OCAC§	12q13.11	SNP1	98	1461	2455	1.06 (0.92-1.23)	1.06 (0.86-1.29)	0.6837	0.6959	0.4679	0.4884
OCAC§	6p21.1	SNP1	97	1475	2418	1.07 (0.91-1.25)	1.17 (0.97-1.41)	0.2417	0.2581	0.0943	0.1102
OCAC§	XRCC5	rs16855489	99	1476	2484	1.05 (0.91-1.21)	1.02 (0.83-1.25)	0.7985	0.807	0.7089	0.7217
Oncogene	BRAF	rs10487888	99	1480	2481	1.02 (0.87-1.19)	0.88 (0.73-1.07)	0.249	0.2659	0.2443	0.2666
Oncogene	BRAF	rs1733832	80	1149	2043	1.07 (0.85-1.34)	3.40 (0.97-11.92)	0.1289	0.1394	0.2404	0.2585
Oncogene	BRAF	rs1267622	97	1458	2443	0.96 (0.83-1.10)	0.83 (0.62-1.12)	0.4445	0.4615	0.2461	0.2682
Oncogene	BRAF	rs13241719	83	1304	2032	1.05 (0.91-1.22)	0.89 (0.69-1.14)	0.4037	0.4186	0.7355	0.7455
Oncogene	BRAF	rs17695623	96	1441	2434	1.24 (0.61-2.51)	1.28 (0.62-2.64)	0.538	0.5536	0.8847	0.8898
Oncogene	BRAF	rs17161747	98	1473	2467	1.19 (0.96-1.47)	1.38 (0.52-3.62)	0.2458	0.2625	0.094	0.11
Oncogene	BRAF	rs17623382	97	1465	2439	0.98 (0.83-1.15)	1.01 (0.59-1.74)	0.9695	0.9709	0.8527	0.8593
Oncogene	BRAF	rs6944385	98	1471	2464	1.15 (0.99-1.35)	0.98 (0.61-1.57)	0.1869	0.2021	0.1463	0.1657
Oncogene	ERBB2	rs2952155	98	1463	2462	1.01 (0.87-1.15)	1.13 (0.84-1.52)	0.7136	0.7249	0.5785	0.596
Oncogene	ERBB2	rs2952156	98	1470	2473	1.00 (0.87-1.14)	1.17 (0.90-1.52)	0.4687	0.4857	0.4481	0.4691
Oncogene	ERBB2	rs1801200	97	1455	2434	1.06 (0.92-1.22)	1.07 (0.80-1.42)	0.702	0.7135	0.4236	0.4449
Oncogene	KRAS	rs12305513	99	1483	2472	0.89 (0.75-1.06)	0.83 (0.42-1.62)	0.3817	0.3994	0.1668	0.1872
Oncogene	KRAS	rs12822857	97	1465	2446	1.01 (0.86-1.18)	0.99 (0.82-1.19)	0.9883	0.9888	0.9441	0.9467
Oncogene	KRAS	rs10842508	98	1476	2469	0.97 (0.84-1.11)	0.99 (0.75-1.31)	0.9112	0.9152	0.7587	0.7694
Oncogene	KRAS	rs12579073	97	1460	2442	0.96 (0.82-1.12)	0.94 (0.78-1.14)	0.8148	0.8225	0.5369	0.5555
Oncogene	KRAS	rs10842513	97	1469	2421	0.98 (0.82-1.17)	0.84 (0.40-1.75)	0.879	0.8843	0.6988	0.7118
Oncogene	KRAS	rs4623993	79	1140	2030	1.05 (0.88-1.24)	1.17 (0.73-1.89)	0.7297	0.7385	0.4498	0.4669
Oncogene	KRAS	rs6487464	98	1470	2448	1.03 (0.89-1.19)	1.02 (0.84-1.24)	0.9319	0.935	0.7956	0.8047
Oncogene	KRAS	rs10842514	98	1473	2442	0.96 (0.83-1.12)	1.12 (0.93-1.35)	0.2317	0.248	0.3125	0.335
Oncogene	KRAS	rs11047917	98	1465	2456	0.88 (0.71-1.08)	1.22 (0.42-3.50)	0.4387	0.4559	0.311	0.3335
Oncogene	NMI	rs394884	95	1412	2390	1.07 (0.92-1.26)	0.99 (0.53-1.86)	0.6693	0.6816	0.4338	0.4544
Oncogene	NMI	rs11551174	79	1150	2040	0.98 (0.77-1.24)	1.24 (0.45-3.42)	0.8999	0.9035	0.9861	0.9866
Oncogene	NMI	rs289831	96	1422	2403	1.07 (0.87-1.33)	0.84 (0.40-1.79)	0.3586	0.3759	0.5856	0.6026
Oncogene	NMI	rs3771886	98	1464	2465	1.00 (0.87-1.16)	1.15 (0.95-1.40)	0.2693	0.2863	0.2006	0.2219
Oncogene	NMI	rs11683487	83	1172	2149	0.78 (0.66-0.93)	0.85 (0.70-1.04)	0.0168	0.0198	0.0668	0.0782
Oncogene	NMI	rs2113509	97	1459	2452	1.09 (0.93-1.28)	1.05 (0.59-1.85)	0.5627	0.5779	0.3195	0.342
Oncogene	PIK3CA	rs2865084	80	1154	2046	1.14 (0.89-1.45)	0.91 (0.26-3.17)	0.5675	0.5799	0.356	0.3744
Oncogene	PIK3CA	rs7621329	97	1466	2424	1.02 (0.88-1.18)	1.18 (0.79-1.76)	0.7211	0.7321	0.557	0.575
Oncogene	PIK3CA	rs1517586	96	1429	2434	0.89 (0.74-1.06)	0.77 (0.39-1.51)	0.3411	0.3583	0.143	0.1618
Oncogene	PIK3CA	rs2699905	97	1445	2439	0.99 (0.86-1.14)	1.04 (0.82-1.32)	0.9342	0.9371	0.8746	0.8802
Oncogene	PIK3CA	rs7641889	98	1478	2463	0.87 (0.71-1.07)	1.22 (0.51-2.91)	0.3637	0.3813	0.297	0.3196
Oncogene	PIK3CA	rs7651265	97	1449	2435	0.91 (0.77-1.08)	1.33 (0.73-2.42)	0.3403	0.3577	0.5891	0.606
Oncogene	PIK3CA	rs7640662	98	1475	2472	1.06 (0.91-1.23)	0.88 (0.57-1.37)	0.6274	0.6413	0.7612	0.7719
Oncogene	PIK3CA	rs2677760	97	1451	2446	0.99 (0.84-1.16)	1.08 (0.90-1.30)	0.5551	0.5704	0.4223	0.4436
‡ Adjusted for population stratification
* GEOCS not done
**Call rate bases on total number of samples analysed.
§ candidate genes identified from the Breast Cancer Association Consortium (BCAC) and Ovarian Cancer Association Consortium (OCAC);
Emboldened P-values are significant at the 5% level. The P-trend looks for a trend between the OR and the heterozygous (Het); and rare homozygous (Hom) when compared with the common homozygous; the P-heterogeneity (P-het) does not assume a correlation with increasing number of rare allele.enboldened odds ratios (OR) do not cross 1.
